# Supplementary material for: Investigation of the relationship between electrical conductivity (EC) of water and soil, and landform classes using fuzzy model and GIS
Source: Copernicus journal article supplement (doi:10.5194/se-2016-30), 2016-03-10
Supplement: Supplementary file [file se-2016-30-AC2-supplement.pdf]

1 **Investigation of the relationship between electrical conductivity (EC) of**  
2 **water and soil, and landform classification in the northern part of**  
3 **Meharloo watershed, Fars province, Iran using fuzzy model and GIS**

4 **Marzieh Mokarram<sup>1</sup> and Dinesh Sathyamoorthy<sup>2</sup>**

5

6 <sup>1</sup>*Marzieh Mokarram (Department of Range and Watershed Management, College of Agriculture*  
7 *and Natural Resources of Darab, Shiraz University, Iran, Email: m.mokarram@shirazu.ac.ir)*

8 <sup>2</sup>*Dinesh Sathyamoorthy (Science & Technology Research Institute for Defence (STRIDE),*  
9 *Ministry of Defence, Malaysia (E-mail: dinesh.sathyamoorthy@stride.gov.my)*

10 **Corresponding author:** *Marzieh Mokarram, Tel.: +98-917-8020115; Fax: +987153546476 ,*  
11 *Address: Darab, Shiraz university, Iran, Postal Code: 71946-84471, Email:*  
12 *m.mokarram@shirazu.ac.ir*

13

14

15

16

17

18

19

20  
21  
22  
23  
24  
25  
26  
27  
28  
29  
30  
31  
32  
33  
34  
35  
36  
37  
38  
39  
40

**Investigation of the relationship between electrical conductivity (EC) of water and soil, and landform classification in the northern part of Meharloo watershed, Fars province, Iran using fuzzy model and GIS**

**Abstract**

In this research, the relationship between landform classification and electrical conductivity (EC) of soil and water in the northern part of Meharloo watershed, Fars province, Iran was investigated using a combination of geographical information system (GIS) and fuzzy model. The results of the fuzzy method for water EC showed that 36.6% of the land to be moderately land suitable for agriculture; high, 31.69%; and very high, 31.65%. In comparison, the results of the fuzzy method for soil EC showed that 24.31% of the land to be as not suitable for agriculture (low class); moderate, 11.78%; high, 25.74%; and very high, 38.16 %. In the total, the land suitable for agriculture with low EC is located in the north and northeast of the study area. The relationship between landform and EC shows that EC of water is high for the valley classes, while the EC of soil is high in the upland drainage class. In addition, the lowest EC for soil and water are in the plain small class.

**Keywords:** Meharloo watershed, Groundwater quality, landform, electrical conductivity (EC), fuzzy model.

## 41        **1. Introduction**

42    Soil features are largely controlled by the landforms on which they are developed. The  
43    physiographic penetration on soil properties is recognized based on the progress of the soil–  
44    landform relationship (Ali and Moghanm, 2013). The landforms formed by the same geomorphic  
45    processes is the main key feature because they can easily be identified, and were responsible for  
46    making the undercoat material of the soils (Park and Burt, 2002; Henderson et al., 2005; Mini et  
47    al. 2007; Poelking et al., 2015). Previous studies have shown that there is a clear relationship  
48    between landform and soils, in that landforms and soil both control hydrological erosional,  
49    biological, and geochemical cycles. Based on the type of landform, other parameters of  
50    watersheds can be predicted, such as soil, erosion, biological and so on (Berendse et al., 2015;  
51    Brevik et al., 2015; Decock et al., 2015; Keesstra et al., 2012; Smith et al., 2015)

52    Geographical information systems(GIS) GIS, with features such as the ability to acquire and  
53    exchange many different sources, organization, retrieval and display of data, analysis of  
54    numerous data, and possibility to provide multiple services, has been introduced as an efficient  
55    tool in the planning. Combining GIS with fuzzy logic provides a comparatively new land  
56    evaluation method (Badenki and Kurtener, 2004; Oinam et al, 2014; Wang et al., 2015).  
57    Incorporating both of these methods is more flexible, and reflects human creativeness and  
58    understanding to make decisions. Fuzzy inference is considered as a deduction for mathematical  
59    modeling in imprecise and vague processes, uncertainty about data and thus makes a context for  
60    modeling uncertainly (Kurtener, 2005).

61    Ali and Moghanm (2013) studied the variation of soil properties over the landforms around Idku  
62    Lake, Egypt, with tthe spatial distribution of CaCO<sub>3</sub>, EC, organic matter (OM), pH, nitrogen (N),  
63    phosphor (P), potassium (K), iron (Fe), manganese (Mn), copper (Cu) and zinc (Zn) over the

64 various landforms discussed in detail. The results showed that the changes of CaCO<sub>3</sub>, EC and  
65 OM are minimal in the landforms of sand sheets, hammocks, sabkhas, clay flats and former lake-  
66 bed.

67 Aliabadi and Soltanifard (2014) apply GIS and fuzzy inference for determination of the impact  
68 of water and soil EC, and calcium carbonate on wheat crop. Regarding the results of the fuzzy  
69 inference system, 76% was achieved using the of Mamdani and 52% of accuracy for the Sugeno  
70 technique was achieved.

71 In addition, El-Keblawy et al (2015) investigated relationships between landforms, soil  
72 characteristics and dominant xerophytes in the northern United Arab Emirates. Soil texture,  
73 electrical conductivity (EC) and pH were determined in each stand. The results showed that soil  
74 and landforms also control the geomorphological and hydrological processes (Cerdà and García-  
75 Fayos, 1997, Cerdà, 1998, Dai et al, 2015, Nadal-Romero et al., 2015).

76

77 One of the largest wheat producing regions in Iran is located in the Shiraz Plain, Fars province  
78 (Bijan-zadeh et al., 2014). The aim of this study is to investigate of the relationship between  
79 landform classes and EC of water and soil in this area using a combination of GIS and fuzzy  
80 models. The methodology employed in this study is summarized in Figure 1.

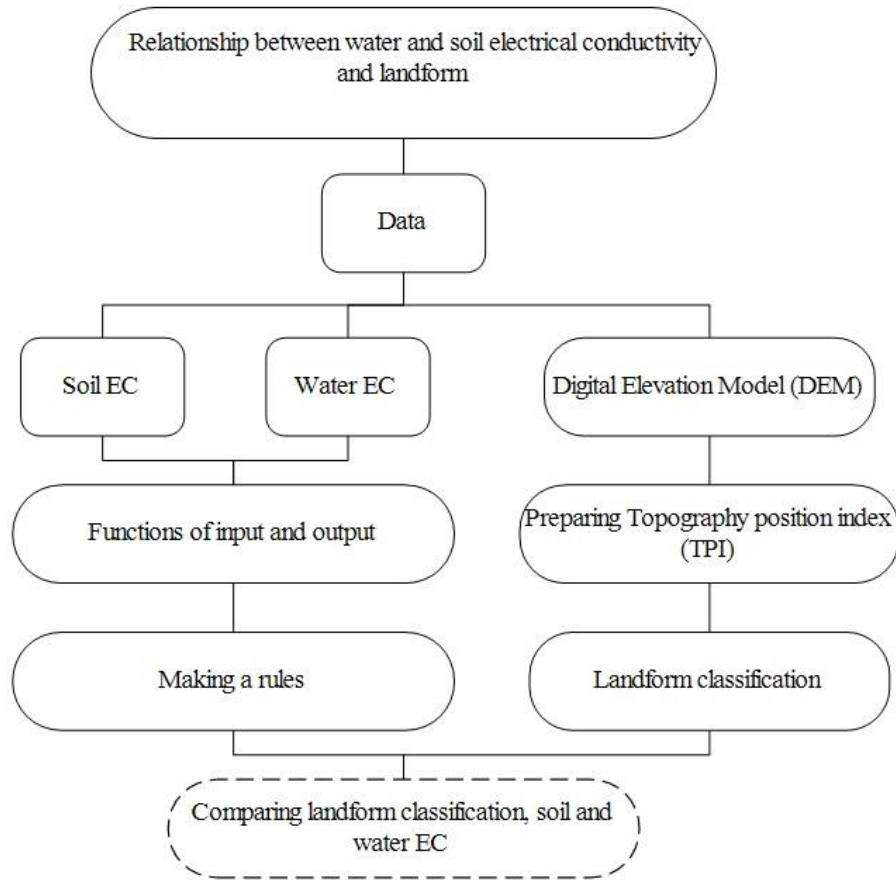

81

82 Figure 1. Flowchart of the methodology employed to investigate the relationship between  
 83 landform classification, and soil and water EC.

84

85 **2. Case study**

86 The study area has an area of 3,909 km<sup>2</sup> and is located at longitude of N 29° 06' - 29° 43' and  
 87 latitude of E 52° 18' to 53° 28' (Figure 2). The altitude of the study area ranges from the lowest  
 88 of 1,433 m to the highest of 3,083 m. The region is located in the north of the Fars province,  
 89 which has cold winters with hot summers. The average temperature for the area is 16.8 °C,  
 90 ranging between 4.7 and 29.2 °C (Soufi, 2004). The research area is a biodiversity of mountains,  
 91 relief and lithology, and geological characteristics such as for instance sedimentary basin and

92 elevated reliefs (Soufi, 2004). The main land use types of the region are agriculture, range land,  
93 farming and forests.

94 In terms of geology the Precambrian Hormoz series and the Quaternary units are the oldest and  
95 youngest rocks in the basin, respectively. Spans of outcropped rocks, covering from the  
96 Cretaceous to Quaternary, are carbonate sediments of deep to shallow marine facies. These  
97 sedimentary sequences include large and small stratigraphic gaps in the form of disconformity  
98 and sometimes nonconformity (Khaksar et al., 2006).

99 The area is situated in an arid and semi-arid region. Rainfall varies from 150mm on the plains to  
100 650mm on the high mountains, with an average of 350 mm. The rainfall is concentrated in cold  
101 seasons, while the precipitation is very low from June to October (Sigaroodi et al., 2014).

102 During winter, several migratory bird species from north of Caspian Sea, flamingos  
103 (*Phoenicopterus roseus*), common shelducks (*Tadorna tadorna*) and mallards (*Anas*  
104 *platyrhynchos*), spend 4 months in the area feeding on brine shrimp (*Artemia franciscana*). Thus,  
105 the lake has important ecological value (Sigaroodi et al., 2014).

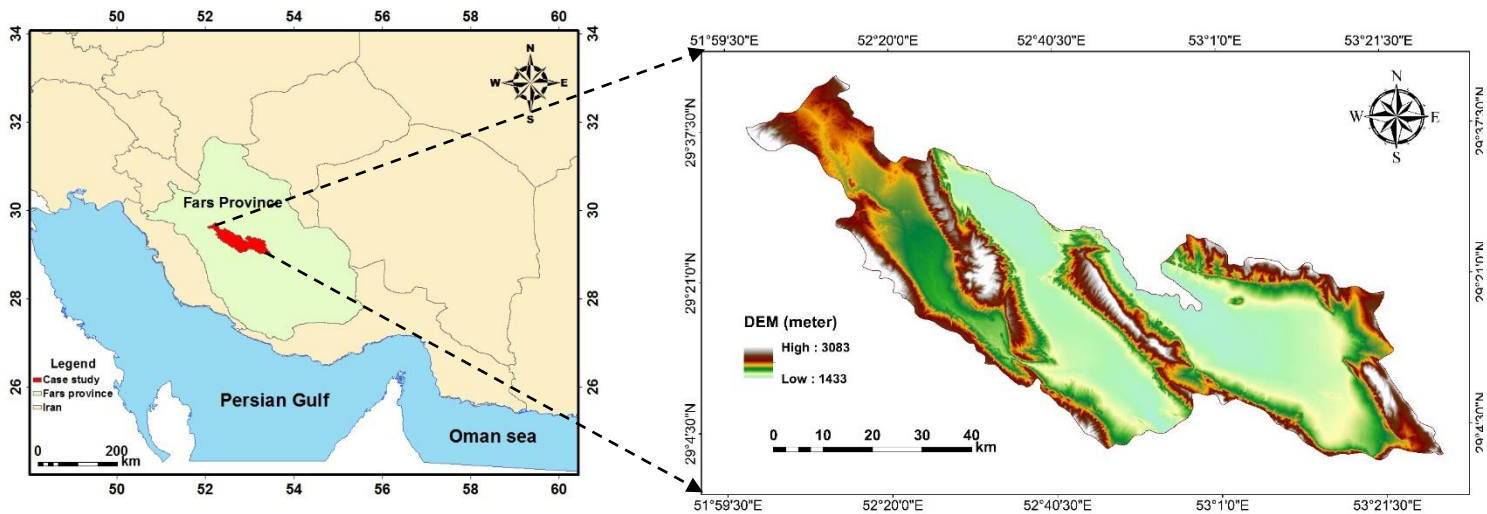

112 Figure 2. Location of the study area (DEM with spatial resolution of 30 m) (Source:  
113 <http://earthexplorer.usgs.gov>).

114

### 115 3. Materials and methods

#### 116 3.1. Inverse Distance Weighted (IDW)

117 IDW model was used for interpolating the EC properties. IDW interpolation explicitly  
118 implements the assumption that things that are close to one another are more alike than those  
119 that are farther apart. To predict a value for any unmeasured location, IDW will be used that  
120 measures neighborhood values in the predicted location. Assumed value of an attribute  $f$  at any  
121 unsampled point is an average of distance-weighted of sampled points lying within a defined  
122 neighborhood around that unsampled point. Basically it is a weighted moving average  
123 (Burrough, et al., 1998):

$$124 \hat{f}(x_0) = \frac{\sum_{i=1}^n f(x_i) d_{ij}^{-r}}{\sum_{i=1}^n d_{ij}^{-r}} \quad (1)$$

125 Where  $x_0$  is the estimation point and  $x_i$  are the data points within a chosen surrounding. The  
126 weights ( $r$ ) are related to distance by  $d_{ij}$ .

127

#### 128 3.2. Fuzzy method

129 In the research, model functions are accustomed to compute membership function (MF), as  
130 described in Figure 3 (Burrough and McDonnell, 1998). In such status, an asymmetric function

131 needs to be applied (Models 1 and 2) (Figure 3). If  $MF(x_i)$  shows individual membership value  
 132 for  $i^{th}$  land property  $x$ , then in the computation process these model functions (Models 1 to 2)  
 133 show the following form:

134 For *asymmetric left* (Model 1):

$$135 \quad MF(x_i) = [1/(1 + \{(x_i - a_1 - b_1)/b_1\}^2)] \text{ if } x_i < (a_1 + b_1) \quad (2)$$

136

137 For *asymmetric right* (Model 2):

$$138 \quad MF(x_i) = [1/(1 + \{(x_i - a_2 + b_2)/b_2\}^2)] \text{ if } x_i > (a_2 - b_2) \quad (3)$$

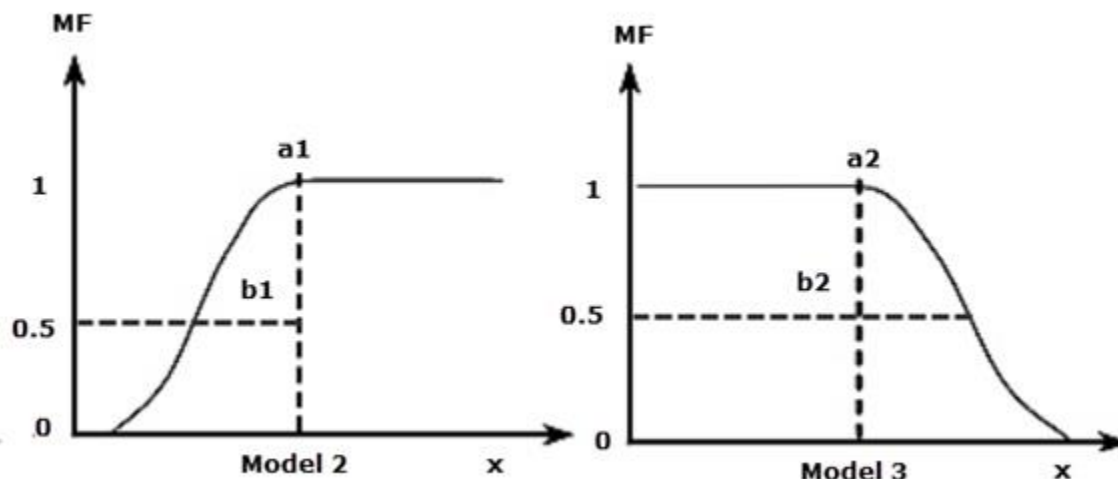

139

140 Figure 3. Membership functions.

141

142 In this study, in order to define fuzzy rule based membership functions, the categories shown in  
 143 Tables 1 and 2 are used.

144 Table 1. Classification of water EC values (Kumar et al., 2003).

| Class    | EC (ds/m)   |
|----------|-------------|
| Low      | < 0.25      |
| Moderate | 0.25 – 0.75 |



|           |             |
|-----------|-------------|
| High      | 0.75 – 2.25 |
| Very high | > 2.25      |

---

145

146

147

148

Table 2. Classification of soil EC values (Mokarram et al., 2010).

| Class     | EC (ds/m) |
|-----------|-----------|
| Low       | < 8       |
| Moderate  | 8-12      |
| High      | 12-16     |
| Very high | > 16      |

---

149

150

### 151 3.3. Landform classification

152 TPI (Weiss, 2001) compares the elevation of each cell in a DEM to the mean elevation of a  
 153 specified neighborhood around that cell. Positive

154 TPI (Eq. (4)) compares the elevation of each cell in a DEM to the mean elevation of a defined  
 155 neighborhood around that cell. Mean elevation is subtracted from the elevation value at center  
 156 (Weiss 2001):

$$157 \quad TPI_i = Z_0 - \sum_{n=1} Z_n / n \quad (4)$$

158 where;

159  $Z_0$ = elevation of the model point under evaluation

160  $Z_n$ = elevation of grid

161  $n$  = the total number of surrounding points employed in the evaluation

162

163 Incorporating TPI at small and large scales permit a number of nested landforms to be distinguished  
 164 (Table 3). The actual breakpoints among classes can be selected to optimize the classification for a  
 165 specific landscape. As in slope position classifications, additional topographic metrics, such as for  
 166 example differences of elevation, slope, or aspect within the neighborhoods, can help delineate  
 167 landforms more accurately (Weiss 2001).

168 Table 3. Topographic Position Index (TPI) thresholds for small and large neighborhoods used to  
 169 define landscape feature classes

| Landform                              | TPI                |                    |
|---------------------------------------|--------------------|--------------------|
|                                       | Small Neighborhood | Large Neighborhood |
| Plains                                | $-1 < TPI < 1$     | $-1 < TPI < 1$ *   |
| Open slopes                           | $-1 < TPI < 1$     | $-1 < TPI < 1$ **  |
| U-shaped valleys                      | $-1 < TPI < 1$     | $TPI < -1$         |
| Mountain tops/High ridges             | $TPI > 1$          | $TPI > 1$          |
| Upper slopes/Mesas                    | $-1 < TPI < 1$     | $TPI > 1$          |
| Midslope drainages/Shallow valleys    | $TPI < -1$         | $-1 < TPI < 1$     |
| Canyons/Deeply incised streams        | $TPI < -1$         | $TPI < -1$         |
| Midslope ridges/Small hills in plains | $TPI > 1$          | $-1 < TPI < 1$     |
| Upland drainages/Headwaters           | $TPI < -1$         | $TPI > 1$          |
| Local ridges/Hills in valleys         | $TPI > 1$          | $TPI < -1$         |

\*Plain landform class required a slope of  $< 0.5$   
 \*\*Open slopes landform class required a slope of  $> 0.5$

170  
 171 Also the classes of canyons, deeply incised streams, midslope and upland drainages, shallow  
 172 valleys, and tend to have strongly negative plane form curvature values. On the other hand, local  
 173 ridges / hills in valleys, midslope ridges, small hills in plains and mountain tops, and high ridges  
 174 have strongly positive plane form curvature values.

175

176 **4. Results and Discussion**

177 **4.1. Inverse Distance Weighted (IDW)**

178 IDW interpolation was used to produce the prediction of soil and water EC, as shown in Figure

179 4. The lowest and highest output for IDW were 0.016 and 14.48 respectively for water EC,

180 while the lowest and highest soil EC were 0 and 34.5 respectively. The interpolation maps for  
181 soil and water EC are shown in Figure 5. The statistical properties of the interpolated soil and  
182 water EC are shown in Table 4.

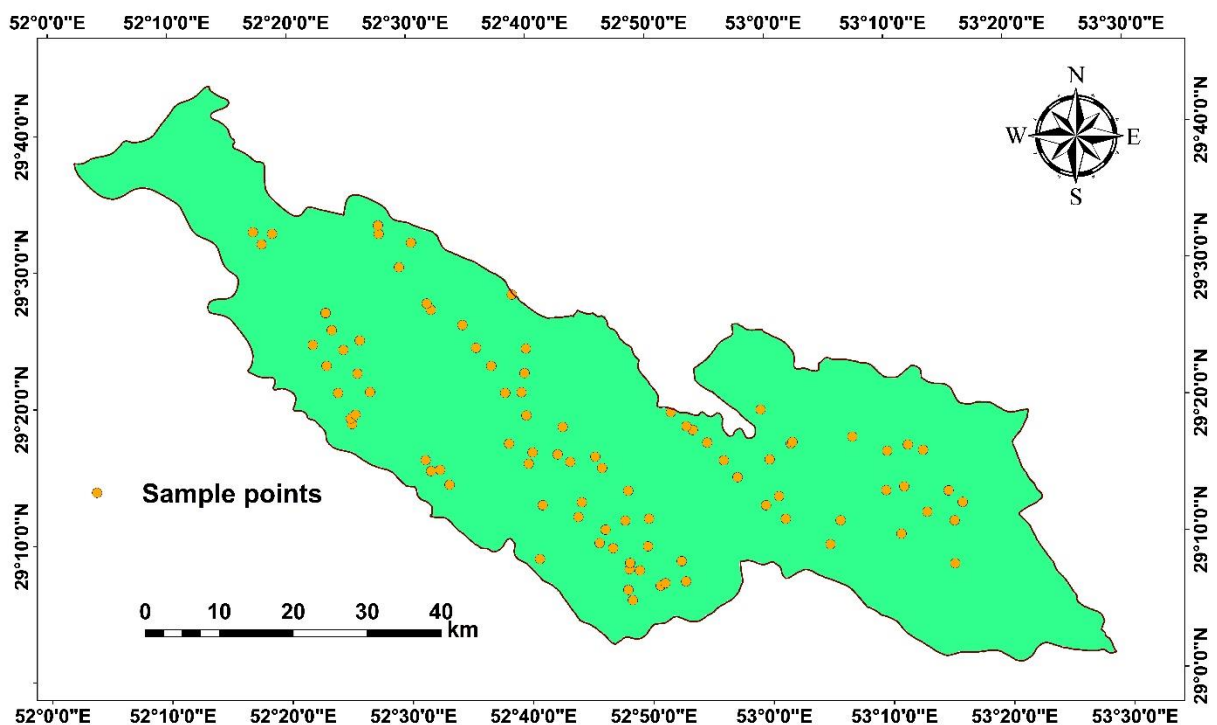

(a)

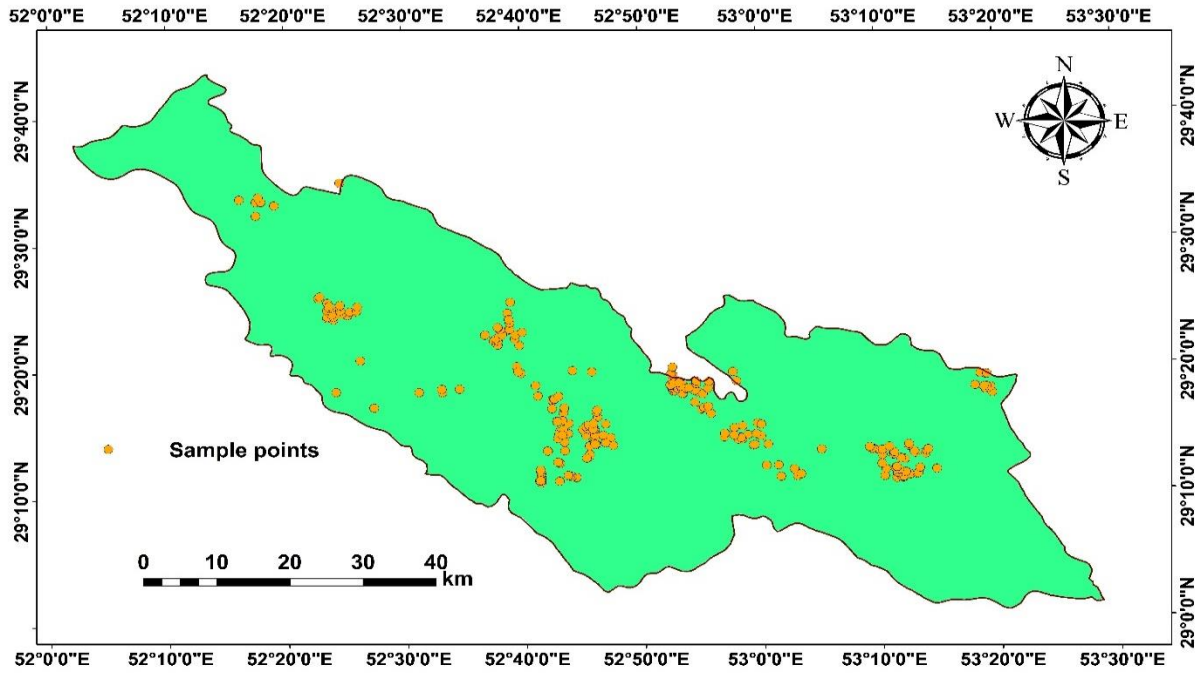

(b)

183 Figure 4. Position of sample points for (a) water and (b) soil EC.

184

Table 4. Descriptive statistics of the water and soil EC.

| Statistic parameter | Water EC (ds/m) | Soil EC (ds/m) |
|---------------------|-----------------|----------------|
| Maximum             | 14.48           | 28.25          |
| Minimum             | 0.016           | 0.78           |
| Average             | 3.80            | 3.91           |
| STDEV               | 6.13            | 3.82           |
| Skewness            | 6.54            | 3.09           |
| Kurtosis            | 62.97           | 15.46          |

185

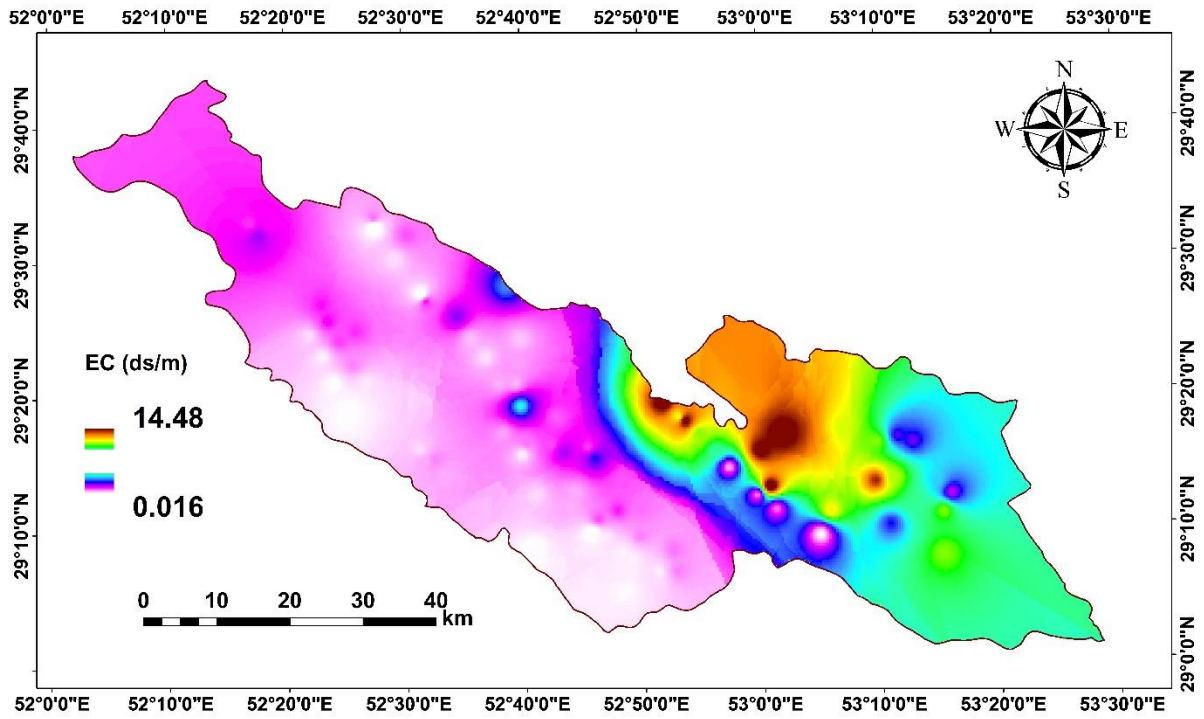

(a)

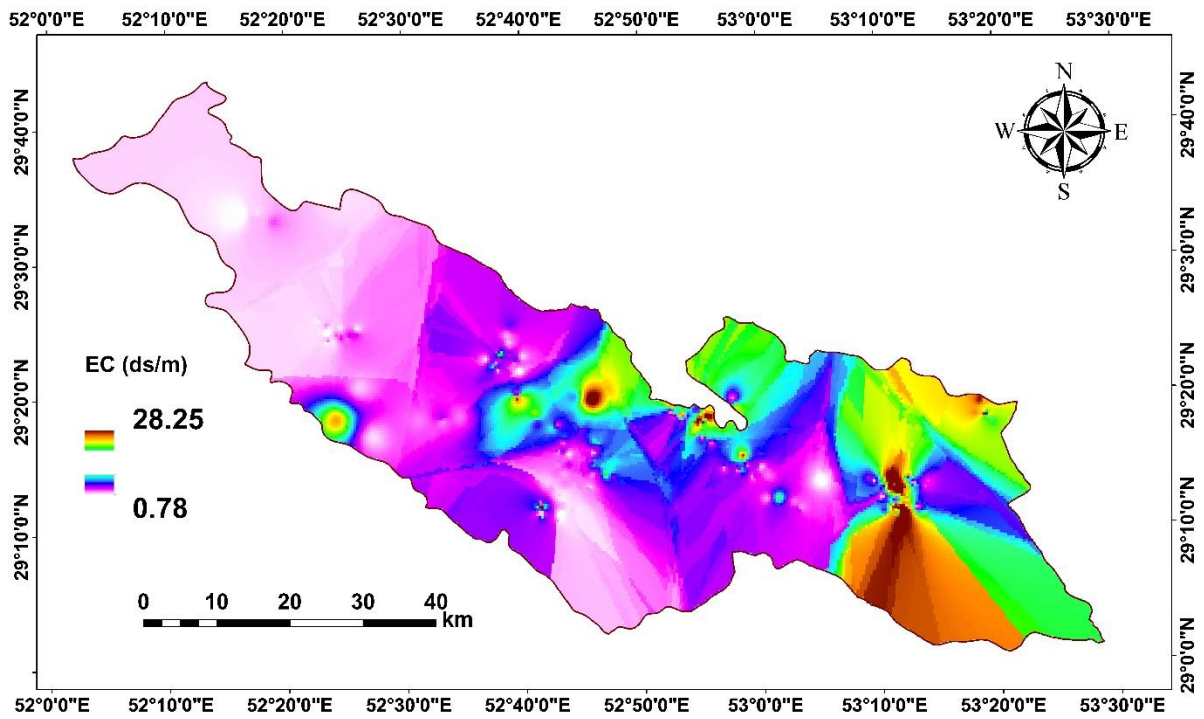

(a)

186 Figure 5. Interpolated maps of study area for (a) water and (b) soil EC.

187

## 188 4.2. Fuzzy method

189 Fuzzy maps were prepared for soil and water EC, as shown in Figure 6. The fuzzy values were

190 classified into four classes. EC < 0.25, EC between 0.25-0.5, EC between 0.5-0.75 and EC >

191 0.75 are in the classes of low, moderate, high and very high respectively (Shobha et al., 2014).

192 The areas of the classes for soil and water EC are shown in Table 5.

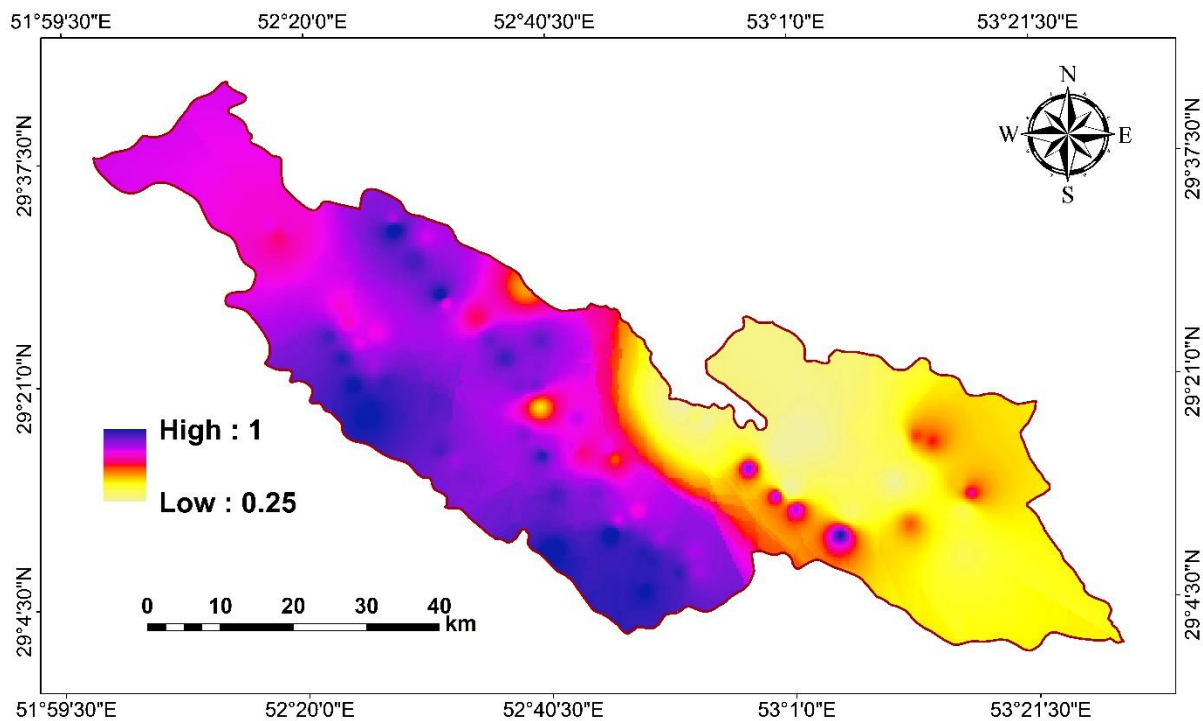

(a)

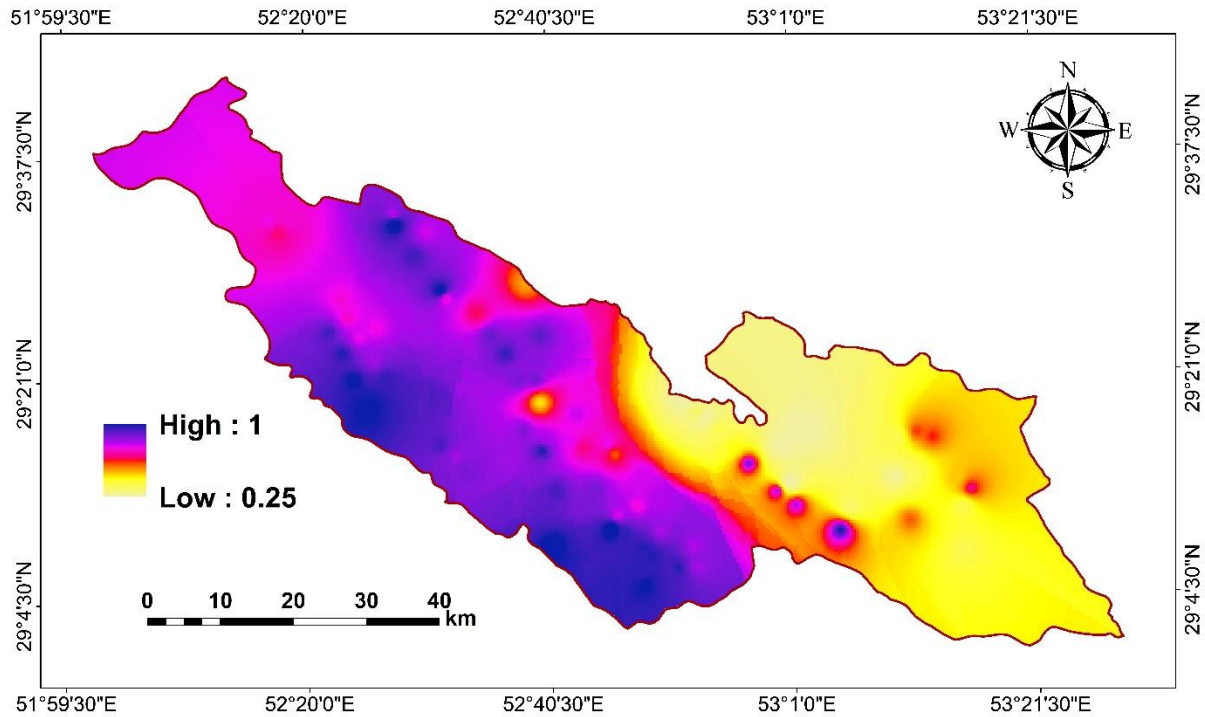

(b)

193 Figure 6. Fuzzy maps of the study area for (a) soil and (b) water EC.

194 Table 5. Areas of the classes for water and soil EC.

| Class     | Area (%) |         | Area (km <sup>2</sup> ) |         |
|-----------|----------|---------|-------------------------|---------|
|           | Water EC | Soil EC | Water EC                | Soil EC |
| Low       | 0.00     | 24.31   | 0.11                    | 950.23  |
| Moderate  | 36.60    | 11.78   | 1430.87                 | 460.63  |
| High      | 31.69    | 25.74   | 1238.91                 | 1006.27 |
| Very high | 31.65    | 38.16   | 1237.10                 | 1491.86 |

195

196 For water EC, the fuzzy model showed that 36.6% of the land was in the moderate class; high,

197 31.69%; and very high, 31.65%. In comparison, the results of the fuzzy model for soil EC

198 showed that 24.31% of the land was in the low class; moderate, 11.78%; high, 25.74%; and very

199 high, 38.16 %. Based on the results obtained, the land suitable for wheat agriculture is located in

200 the north and northeast in the study area.

201



202 **4.3. Landform classification**

203 In order to determine of relationship between landform classification, and soil and water EC, the  
204 landform map of the study area was prepared. Using TPI, the landform classification map of the  
205 study area was generated. The TPI maps generated using small and large neighborhoods are  
206 shown in Figures 7. TPI is between -106 to 130 and -334 to 533 for 3 and 45 cells for small and  
207 large neighborhoods respectively (Figure 8). The landform maps generated based on the TPI  
208 values are shown in Figure 8. The classification has ten classes; high ridges, midslope ridges,  
209 upland drainage, upper slopes, open slopes, plains, valleys, local ridges, midslope drainage and  
210 streams. The areas of the landform classes are shown in Figure 9. It is observed that the largest  
211 landform is streams, while the smallest is plains.

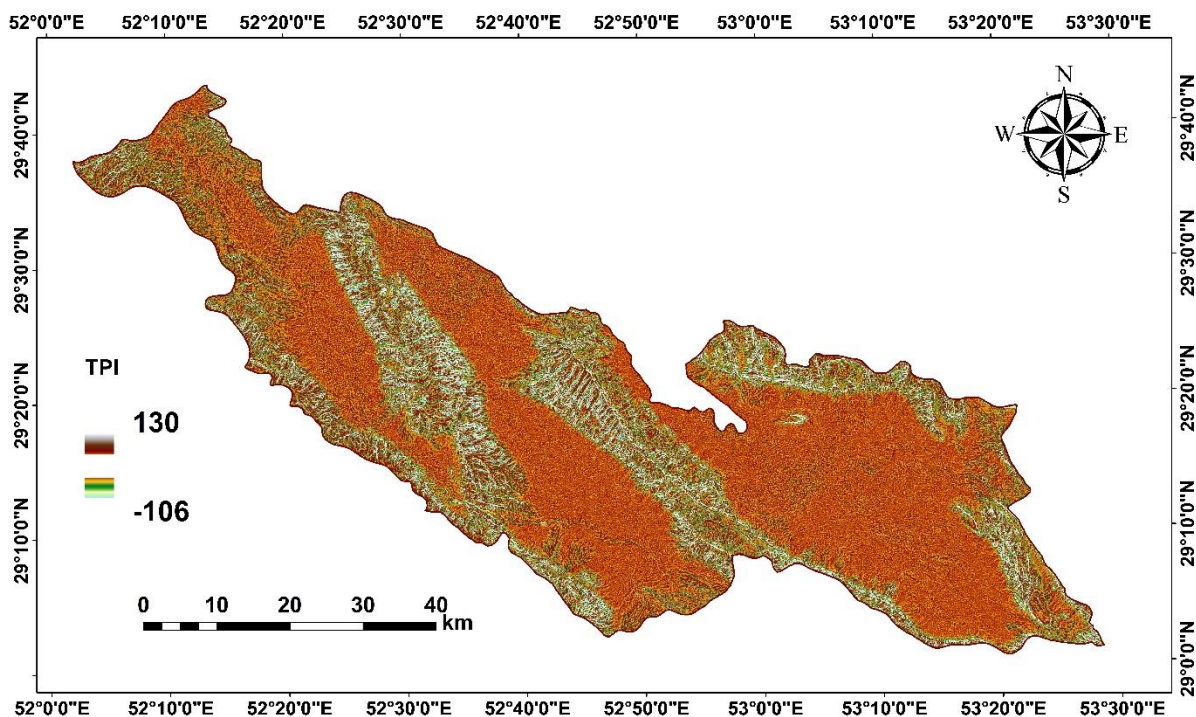

(a)



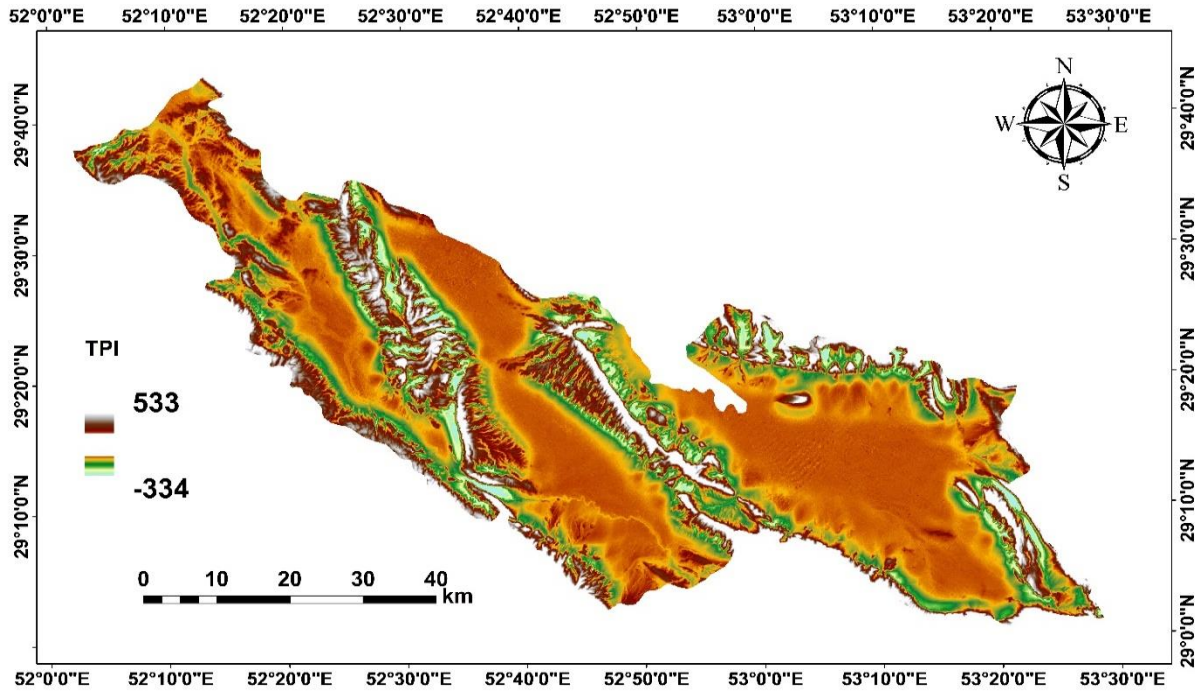

(b)

212 Figure 7. TPI maps generated using (a) small (3 cells) and (b) large (45 cells) neighborhood.

213

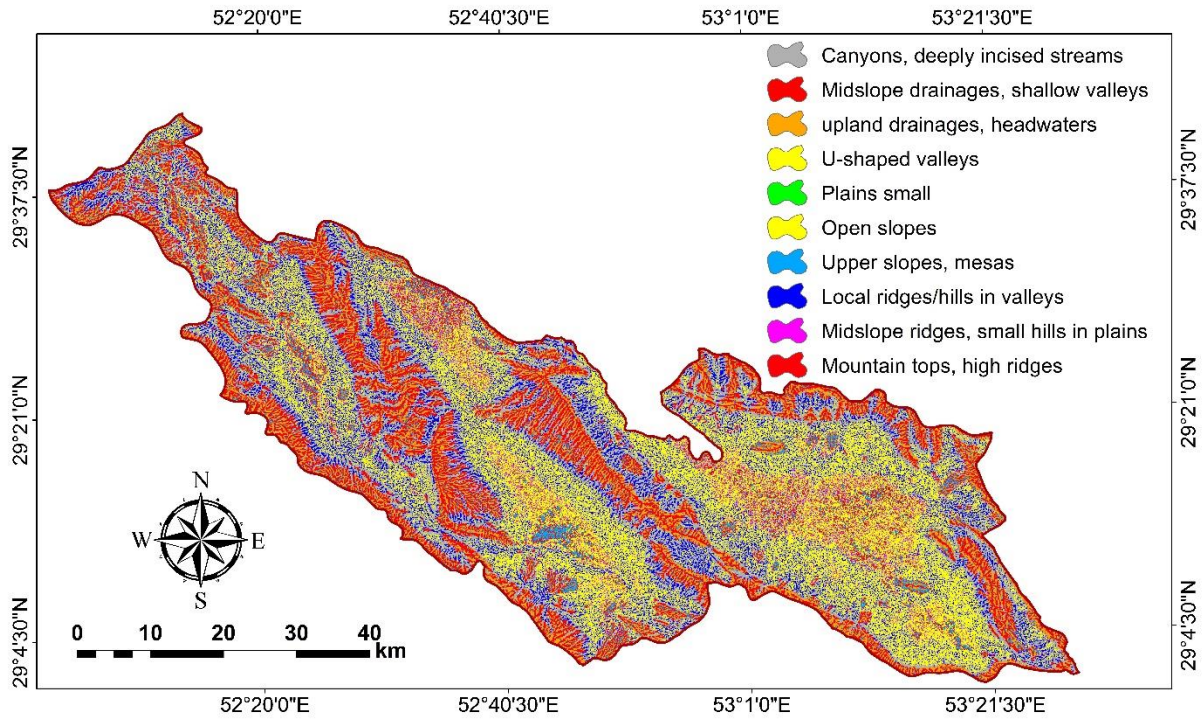

214

215 Figure 8. Landform classification using the TPI method.

216

217 The average EC for each landform class was determined, and the relationship between EC and  
 218 landform was prepared. According to Figure 9, the EC of water is high for the valley class while  
 219 high EC of soil is in upland drainage class. The lowest EC for soil and water are in the plain  
 220 small class.

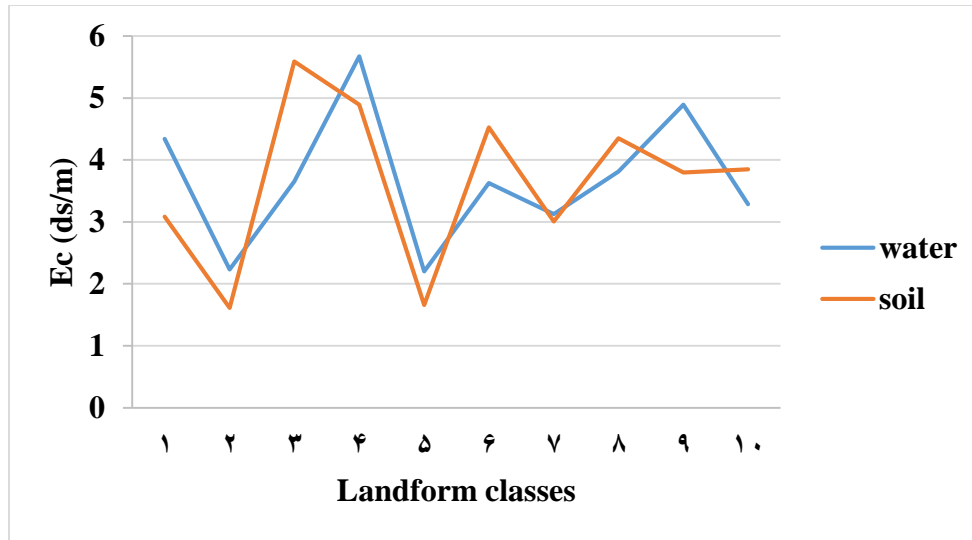

221

222

Figure 9. Relationship between landform classes.

223 |Ali and Moghanm (2013), who investigated the relationship between soil properties and

224 landform classes in Idku Lake, Egypt, also found that the lowest EC was in plain class. In fact,

225 there is a relationship between soil parameters and land use (Wasak and Drewnik, 2015;

226 Debasish-Saha et al., 2014). Yu et al. (2012) showed that there is relationship between soil

227 parameters (such as soil organic carbon (SOC), soil total nitrogen (STN)) and types of land cover

228 (grassland, farmland, swampland). Niu et al. (2015) and Yu et al. (2015) investigated the

229 relationship between land use and soil moisture. The results provided an insight into the

230 significances for land use and farming water management in this area. Saha and Kukal (2015)

231 found that there is a relationship between soil structural stability and land use. The results

232 indicated the degradation of soil physical attributes due to the conversion of natural ecosystems

233 to farming system and increased erosion hazards. In fact, for landforms that are located in high

234 elevation such as mountains, the leaching process is high, while for landforms that are located in

235 low elevation such as plain, there is the accumulation process. Hence, in the study area and

236 similar researches EC value was recorded high in the lower topographical position (Walia and

237 Chamuah, 1994; Singh and Rathore, 2015). Based on this, without measuring salinity in a  
238 laboratory, EC and other soil properties can be estimated using satellite data such as DEMs,  
239 which can save time and money.

240

241

## 242 **5. Conclusion**

243 In this study, the relationship between classes of landform, and electrical conductivity (EC)  
244 of soil and water was in the Shiraz Plain was investigated using a combination of  
245 geographical information system (GIS) and fuzzy model. The results of the fuzzy method for  
246 water EC showed that 36.6% of the land to be moderately land suitable for agriculture; high,  
247 31.69%; and very high, 31.65%. In comparison, the results of the fuzzy method for soil EC  
248 showed that 24.31% of the land to be as not suitable for agriculture (low class); moderate,  
249 11.78%; high, 25.74%; and very high, 38.16 %. In the total, the land suitable for agriculture with  
250 low EC is located in the north and northeast of the study area. The relationship between landform  
251 and EC shows that EC of water is high for the valley classes, while EC of soil is high in the  
252 upland drainage class. In addition, the lowest EC for soil and water are in the plain small class.

253

## 254 **References**

- 255 1. Ali R. R. and Moghanm, F. S: Variation of soil properties over the landforms around  
256 Idku lake, Egypt. The Egyptian Journal of Remote Sensing and Space Sciences  
257 (2013) 16, 91–101, 2013.

- 258 2. Ali, R. R., Ageeb, G. w. and Wahab, M. A.: Assessment of soil capability for  
259 agricultural use in some areas West of the Nile Delta,Egypt: an application study  
260 using spatial analyses. J. Appl. Sci.Res. 3-11, 1622–1629, 2007.
- 261 3. Aliabadi, K. and Soltanifard, H.: The Impact Of Water And Soil Electrical  
262 Conductivity And Calcium Carbonate On Wheat Crop Using A Combination Of  
263 Fuzzy Inference System And GIS. International journal of scientific & technology  
264 research volume 3, ISSUE 9, 118-124, 2014.
- 265 4. Badenko, v. and kurtener, D.: Fuzzy modeling in GISenvironment to support  
266 sustainable land use planning. The AGILEconference on geographic information  
267 science. 29 April-1may. Heralion, Greece, parallel session a.1-geographic knowledge  
268 discovery, 2004.
- 269 5. Berendse, F., van Ruijven, J., Jongejans, E. and Keesstra, S.: Loss of plant species  
270 diversity reduces soil erosion resistance Ecosystems, 18 (5), 881-888, 2015.
- 271 6. Bijanzadeh, E., Mokarram, M. and Naderi, R.: Applying Spatial Geostatistical  
272 Analysis Models for Evaluating Variability of Soil Properties in Eastern Shiraz, Iran.  
273 Iran Agricultural Research, Vol. 33, No. 2, 2014.
- 274 7. Brevik, E. C., Cerdà, A., Mataix-Solera, J., Pereg, L., Quinton, J. N., Six, J. and Van  
275 Oost, K.: The interdisciplinary nature of Soil, Soil, 1, 117-129, DOI:10.5194/soil-1-  
276 117-2015.
- 277 8. Burrough, P. A. and McDonnell, R. A.: Principles of geographical information  
278 systems. Spatial Information System and Geostatistics. Oxford University Press, New  
279 York, 1998.

- 280 9. Cerdà, A.: The influence of geomorphological position and vegetation cover on the  
281 erosional and hydrological processes on a Mediterranean hillslope (1998)  
282 Hydrological Processes, 12 (4), pp. 661-671, 1998.
- 283 10. Cerdà, A. and García-Fayos, P.: The influence of slope angle on sediment, water and  
284 seed losses on badland landscapes. *Geomorphology*. 18(2), pp.77–90, 1997.
- 285 11. Dai, Q., Liu, Z., Shao, H. and Yang, Z.: Karst bare slope soil erosion and soil quality:  
286 A simulation case study. *Solid Earth*, 6 (3), pp. 985-995, DOI: 10. 5194/se-6-985-  
287 2015.
- 288 12. Debasish-Saha, Kukal, S. S. and Bawa, S. S.: Soil organic carbon stock and fractions  
289 in relation to land use and soil depth in the degraded Shiwaliks hills of lower  
290 Himalayas. *Land Degradation and Development*, 25 (5), pp. 407-416, 2014.
- 291 13. Decock, C., Lee, J., Necpalova, M., Pereira, E. I. P., Tendall, D. M. and Six J.:  
292 Mitigating N<sub>2</sub>O emissions from soil: from patching leaks to transformative action  
293 *Soil*, 1, 687-694, 2015.
- 294 14. El-Keblawy, A., Abdelfattah, M. A. and Khedr, A.: Relationships between landforms,  
295 soil characteristics and dominant xerophytes in the hyper-arid northern United Arab  
296 Emirates. *Journal of Arid Environments* 117 (2015) 28e36, 2015.
- 297 15. Henderson, B. L., Bui, E. N., Moran, C. J. and Simon, D. A. P.: Australia-wide  
298 predictions of soil properties using decision trees. *Geoderma* 124, 383–398, 2005.
- 299 16. Keesstra, S. D., Geissen, V., van Schaik, L., Mosse, K. and Piirainen, S.: Soil as a  
300 filter for groundwater quality. *Current Opinions in Environmental Sustainability* 4,  
301 507-516, DOI:10.1016/j.cosust.2012.10.007.

- 302 17. Khaksar, K. Goodarzi, M. Gharibreza M. and Rahmati, M.: A Study on the Sensivity  
303 of Geological Formations to Erosion in \_\_the Maharlou Basin. Journal of Earth  
304 Sciences, No. 62. 14 pp. 2006.
- 305 18. Kumar, A., Bohra, C. and Singh, L. K.: Environment, Pollution and Management.  
306 APH Publishing, 2003 - Environmental management - 604 pages. ISBN: 81- 7648-  
307 419-9, 2003.
- 308 19. Kurtener, D., Green, T. R., Krueger–Shvetsova, E. and Erskine, R. H.: Exploring  
309 Relationships Between Geomorphic Factors and Weaht Yield Using Fuzzing  
310 Inference System, Hydrology Days, 121-130, 2005.
- 311 20. Mini, V., Patil, P. L. and Dasog, G. S.: A remote sensing approach for establishing  
312 the soil physiographic relationship in the Coastal agro eco system of North  
313 Karnataka. Karnataka J. Agric. Sci. 20–3, 524–530, 2007.
- 314 21. Mokarram, M., Rangzan, K., Moezzi, A. and Baninemeh, J.: Land suitability  
315 evaluation for wheat cultivation by fuzzy theory approache as compared with  
316 parametric method. The International Archives of the Photogrammetry, Remote  
317 Sensing and Spatial Information Sciences, Vol. 38, Part II, 2010.
- 318 22. Nadal-Romero, E., Revuelto, J., Errea, P. and López-Moreno, J. I.: The application of  
319 terrestrial laser scanner and SfM photogrammetry in measuring erosion and  
320 deposition processes in two opposite slopes in a humid badlands area (central Spanish  
321 Pyrenees). Soil 1, 561-573, DOI:10.5194/soil-1-561-2015.
- 322 23. Niu C. Y., Musa A. and Liu Y.: Analysis of soil moisture condition under different  
323 land uses in the arid region of Horqin sandy land, northern China. Solid Earth, 6 (4),  
324 pp. 1157-1167, 2015.

- 325 24. Oinam B. C., Marx W., Scholten T. and Wieprecht S.: A fuzzy rule base approach for  
326 developing a soil protection index map: A case study in the upper awash basin,  
327 Ethiopian highlands. *Land Degradation and Development*, 25 (5), pp. 483-500, DOI:  
328 10. 1002/ldr. 2166, 2014.
- 329 25. Park, S. J. and Burt, T. P.: Identification and characterization of pedo-  
330 geomorphological processes on a hillslope. *Soil Sci. Soc. Am.J.* 66, 1897–1910,  
331 2002.
- 332 26. Poelking E. L., Schaefer C. E. R., Fernandes Filho E. I., De Andrade A. M.,  
333 Spielmann A. A. Soil-landform-plant-community relationships of a periglacial  
334 landscape on Potter Peninsula, maritime Antarctica. (2015) *Solid Earth*, 6 (2), pp.  
335 583-594. DOI: 10. 5194/se-6-583-2015
- 336 27. Saha, D. and Kukal, S. S.: Soil structural stability and water retention characteristics  
337 under different land uses of degraded lower himalayans of North-West India. *Land*  
338 *Degradation and Development*, 26 (3), pp. 263-271, 2015.
- 339 28. Shobha, G. Gubbi, J., Raghavan, K. S., Kaushik, L. K. and Palaniswami, M.: A novel  
340 fuzzy rule based system for assessment of ground water potability: A case study in  
341 South India. *IOSR Journal of Computer Engineering (IOSR-JCE)*. Volume 15, Issue 2  
342 (Nov. - Dec. 2013), PP 35-41, 2014.
- 343 29. Sigaroodi, S. K. Chen, Q. Ebrahimi, S. Nazari, A. and Choobin B.: Long-term  
344 precipitation forecast for drought relief using atmospheric circulation factors: a study  
345 on the Maharloo Basin in Iran. *Hydrol. Earth Syst. Sci.*, 18, 1995–2006.2014.
- 346 30. Singh, D.P., and Rathore, M.S.: Morphological, physical and chemical properties of  
347 soils associated in top sequence for establishing taxonomy classes in Pratapgarh



- 348 District of Rajasthan, India. African Journal of Agricultural Research. Vol. 10(25),  
349 pp. 2516-2531, 18 June, 2015
- 350 31. Smith, P., Cotrufo, M. F., Rumpel, C., Paustian, K., Kuikman, P. J., Elliott, J. A.,  
351 McDowell, R., Griffiths, R. I., Asakawa, S., Bustamante, M., House, J. I., Sobocká,  
352 J., Harper, R., Pan, G., West, P. C., Gerber, J. S., Clark, J.M., Adhya, T., Scholes,  
353 R.J. and Scholes, M.C.: Biogeochemical cycles and biodiversity as key drivers of  
354 ecosystem services provided by soils. Soil 1, 665-685, DOI:10.5194/soil-1-665-2015.
- 355 32. Soufi, M.: Morpho-climatic classification of gullies in fars province, southwest of i.r.  
356 iran . International Soil Conservation Organisation Conference – Brisbane, 2004.
- 357 33. Walia, C.S. and Chamuah, G.S.: Soils of riverine plain in Arunachal plain and their  
358 suitability for some agricultural crops. J. Indian Soc. Soil Sci. 42:425-429. 1994.
- 359 34. Wang, J., Ge, A., Hu, Y., Li, C. and Wang, L.: A fuzzy intelligent system for land  
360 consolidation - A case study in Shunde, China Solid Earth, 6 (3), pp. 997-1006, DOI:  
361 10.5194/se-6-997-2015.
- 362 35. Wasak, K. and Drewnik, M.: Land use effects on soil organic carbon sequestration in  
363 calcareous Leptosols in former pastureland-a case study from the Tatra Mountains  
364 (Poland). Solid Earth, 6 (4), pp. 1103-1115, 2015.
- 365 36. Weiss, A.: Topographic Positions and Landforms Analysis (Conference Poster).  
366 ESRI, 2001.
- 367 37. Yu, B., Stott, P., Di, X.Y. and Yu, H. X.: Assessment of land cover changes and their  
368 effect on soil organic carbon and soil total nitrogen in daqing prefecture, China. Land  
369 Degradation and Development, 25 (6), pp. 520-531, 2014.

370 38. Yu, Y., Wei, W., Chen, L. D., Jia, F. Y., Yang, L., Zhang, H. D. and Feng, T. J.:  
371 Responses of vertical soil moisture to rainfall pulses and land uses in a typical loess  
372 hilly area, China. *Solid Earth*, 6 (2), pp. 595-608. Cited 1 time, 2015.
